# Supplementary material for: Unique and generic structural features of cholinium amino acid-based biocompatible ionic liquids
Source: Royal Society of Chemistry journal article supplement (doi:10.1039/d1cp00937k), 2021-01-01
Supplement: d1cp00937k1.pdf [file d1cp00937k1.pdf]

# **Unique and Generic Structural Features of Cholinium Amino Acid Biocompatible Ionic Liquids**

Harender S. Dhatarwal and Hemant K. Kashyap\*

*Department of Chemistry, Indian Institute of Technology Delhi, Hauz Khas, New Delhi 110016, India*

E-mail: [hkashyap@chemistry.iitd.ac.in](mailto:hkashyap@chemistry.iitd.ac.in)

Phone: +91-(0)11-26591518. Fax: +91-(0)11-26581102

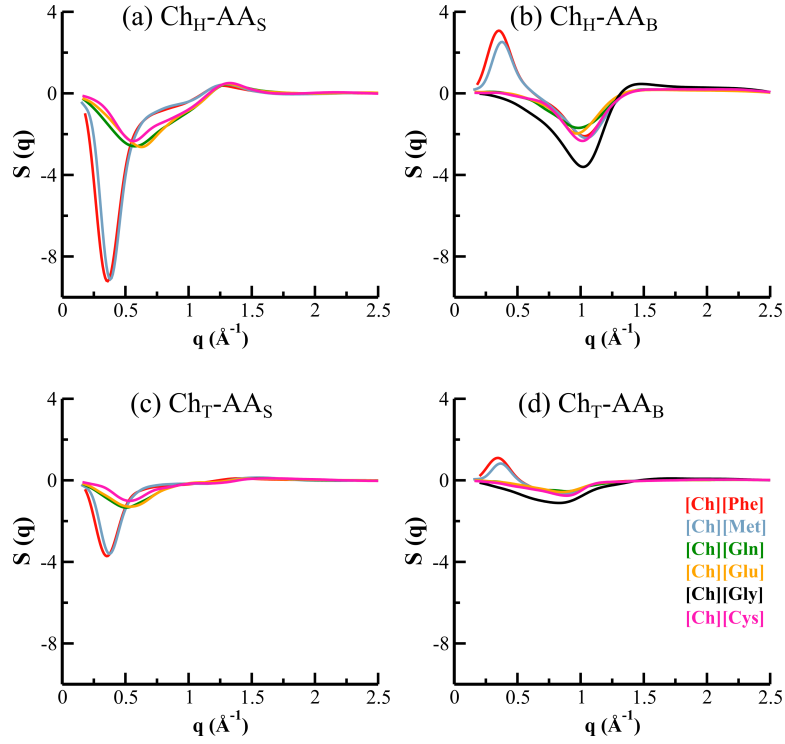

Figure S1: Anionic components of species wise deconstructed total X-ray  $S(q)$  for all the bio-ILs. For [Ch][Phe] and [Ch][Met] ILs, distinctive features arise in the lower  $q$  region attributed to the intermediate range ordering induced in the system by the side-side chain interactions.

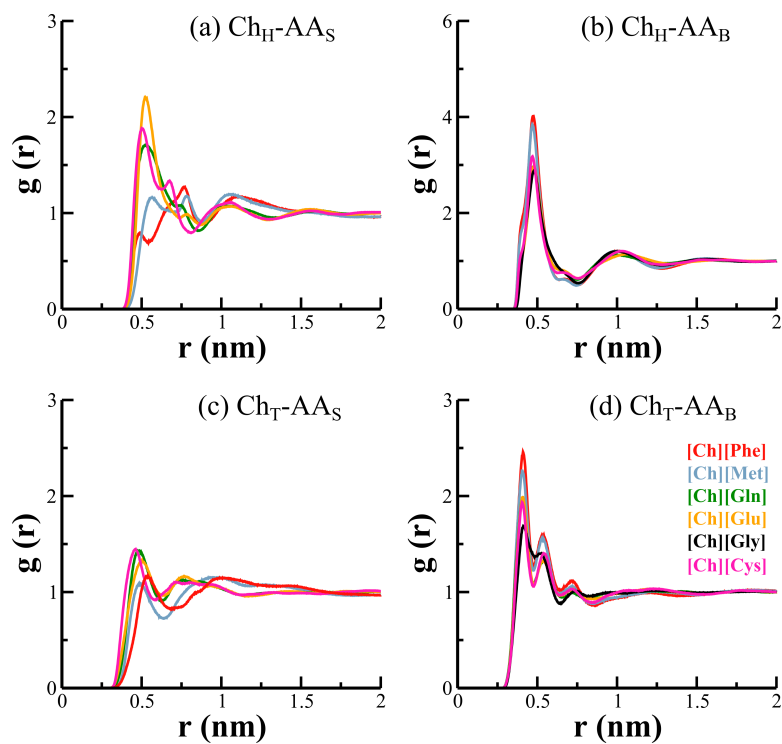

Figure S2: Radial distribution functions,  $g(r)$ s, for cross-species components of cation and anion present in all the bio-ILs.
